# Supplementary material
Source: MDPI journal article supplement (https://www.mdpi.com/2079-9284/2/4/368)
Supplement: s1 [file s1]

## Supplementary Materials

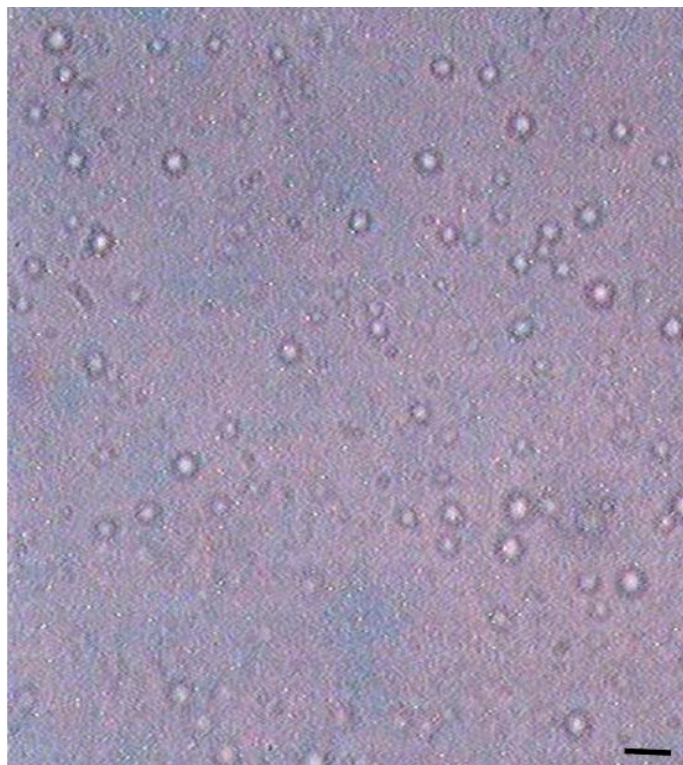

**Figure S1.** Microscopic photograph of a typical macro-emulsion. Scale bar denotes 1  $\mu\text{m}$ .

**Table S1.** Values of skin roughness (SEr), skin scaliness (SEsc), skin smoothness (SEsm) and skin wrinkles (SEw) after chronically application of active formulation (AF) and placebo (P) in volunteers cheeks ( $n = 13$ ). No statistical significant ( $p > 0.05$ ) difference was found among the values with respect to time.

| SELS Parameters    | TIME 0            |                   | MONTH 1           |                   | MONTH 2           |                   | MONTH 3           |                   |
|--------------------|-------------------|-------------------|-------------------|-------------------|-------------------|-------------------|-------------------|-------------------|
|                    | AF                | P                 | AF                | P                 | AF                | P                 | AF                | P                 |
| Mean SEr $\pm$ SD  | 2.90 $\pm$ 0.096  | 2.94 $\pm$ 0.102  | 2.87 $\pm$ 0.092  | 2.94 $\pm$ 0.101  | 2.82 $\pm$ 0.093  | 2.88 $\pm$ 0.097  | 2.78 $\pm$ 0.091  | 2.92 $\pm$ 0.102  |
| Mean SEsc $\pm$ SD | 1.65 $\pm$ 0.026  | 1.68 $\pm$ 0.023  | 1.61 $\pm$ 0.024  | 1.67 $\pm$ 0.024  | 1.59 $\pm$ 0.023  | 1.66 $\pm$ 0.024  | 1.56 $\pm$ 0.023  | 1.66 $\pm$ 0.024  |
| Mean SEsm $\pm$ SD | 98.63 $\pm$ 2.547 | 98.62 $\pm$ 2.524 | 96.63 $\pm$ 2.582 | 98.81 $\pm$ 2.516 | 94.48 $\pm$ 2.505 | 98.42 $\pm$ 2.494 | 91.90 $\pm$ 2.530 | 98.51 $\pm$ 2.234 |
| Mean SEw $\pm$ SD  | 60.43 $\pm$ 1.133 | 59.82 $\pm$ 1.305 | 60.65 $\pm$ 1.104 | 60.03 $\pm$ 1.287 | 58.94 $\pm$ 1.174 | 60.04 $\pm$ 1.262 | 58.01 $\pm$ 1.141 | 59.79 $\pm$ 1.303 |

© 2015 by the authors; licensee MDPI, Basel, Switzerland. This article is an open access article distributed under the terms and conditions of the Creative Commons Attribution license (<http://creativecommons.org/licenses/by/4.0/>).
